# Supplementary figures and images for: Life history and distribution of mysids (Tenagomysis spp.) in estuaries of southern New Zealand: an eco-physiological approach
Source: MDPI journal article supplement (doi:10.3390/nu16030411), 2014-01-01

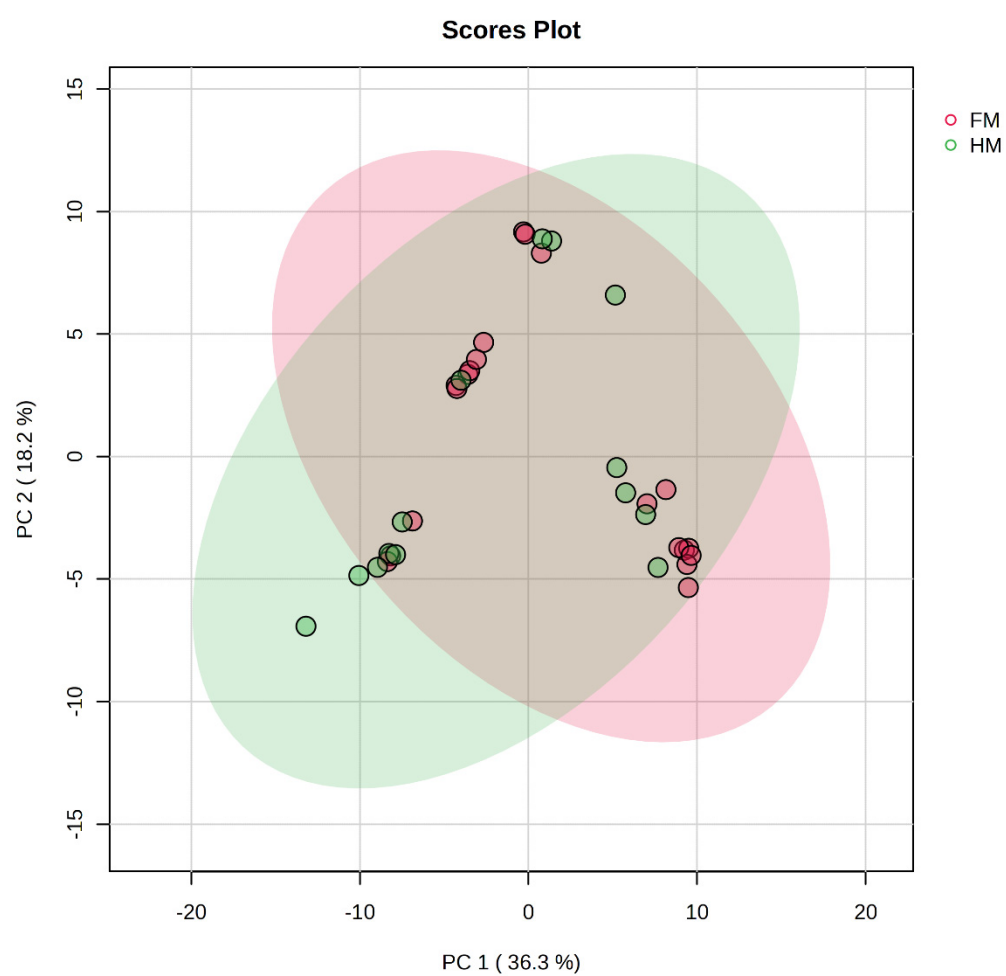

**Figure S1. PCA plot**

Supplement: s1 [file s1]
